# Supplementary material for: Facile construction of highly redox active carbons with regular micropores and rod-like morphology towards high-energy supercapacitors
Source: Royal Society of Chemistry journal article supplement (doi:10.1039/d0qm01101k), 2021-01-01
Supplement: d0qm01101k1.pdf [file d0qm01101k1.pdf]

## Electronic Supplementary Information

### Facile construction of highly redox active carbons with regular micropores and rod-like morphology towards high-energy supercapacitors

Mulati Mansuer,<sup>a</sup> Ling Miao,\*<sup>a</sup> Dazhang Zhu,<sup>a</sup> Hui Duan,<sup>a</sup> Yaokang Lv,<sup>c</sup> Liangchun Li,<sup>a</sup> Mingxian Liu\*<sup>ab</sup> and Lihua Gan\*<sup>a</sup>

*<sup>a</sup>Shanghai Key Lab of Chemical Assessment and Sustainability, School of Chemical Science and Engineering, Tongji University, Shanghai 200092, P. R. China*

*<sup>b</sup>College of Chemistry and Molecular Engineering, Zhengzhou University, Zhengzhou 450001, P. R. China.*

*<sup>c</sup>College of Chemical Engineering, Zhejiang University of Technology, Hangzhou 310014, P. R. China*

#### **\*Corresponding Authors**

E-mail: [1310593@tongji.edu.cn](mailto:1310593@tongji.edu.cn) (L. Miao), [liumx@tongji.edu.cn](mailto:liumx@tongji.edu.cn) (M. Liu), [ganlh@tongji.edu.cn](mailto:ganlh@tongji.edu.cn) (L. Gan)

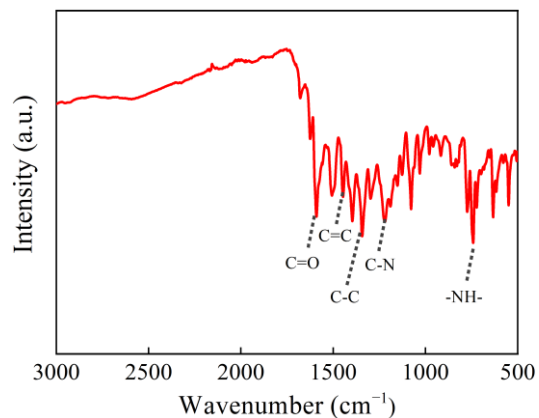

**Fig. S1** FT-IR spectrum of the benzoquinone/*p*-phenylenediamine precursor.

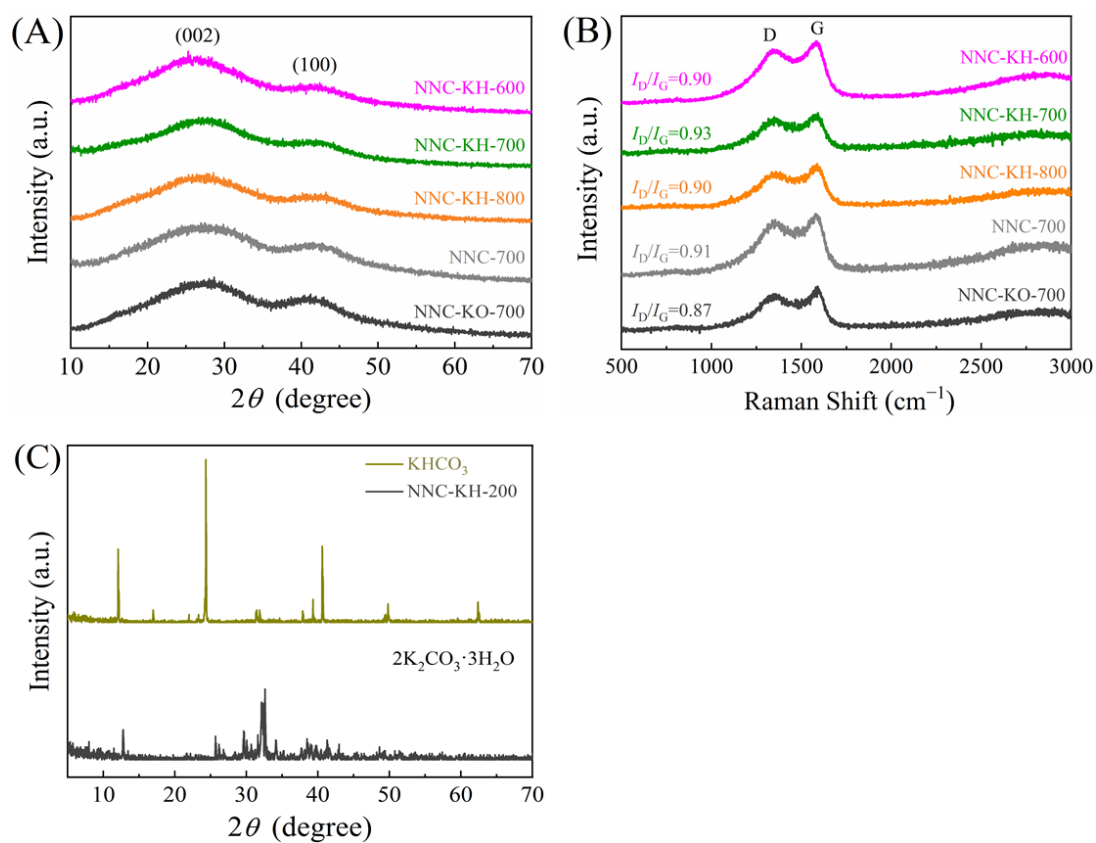

**Fig. S2** XRD patterns of NNCs (A). Raman spectra of NNCs (B). XRD patterns of  $\text{KHCO}_3$  and NNC-KH-200 (C).

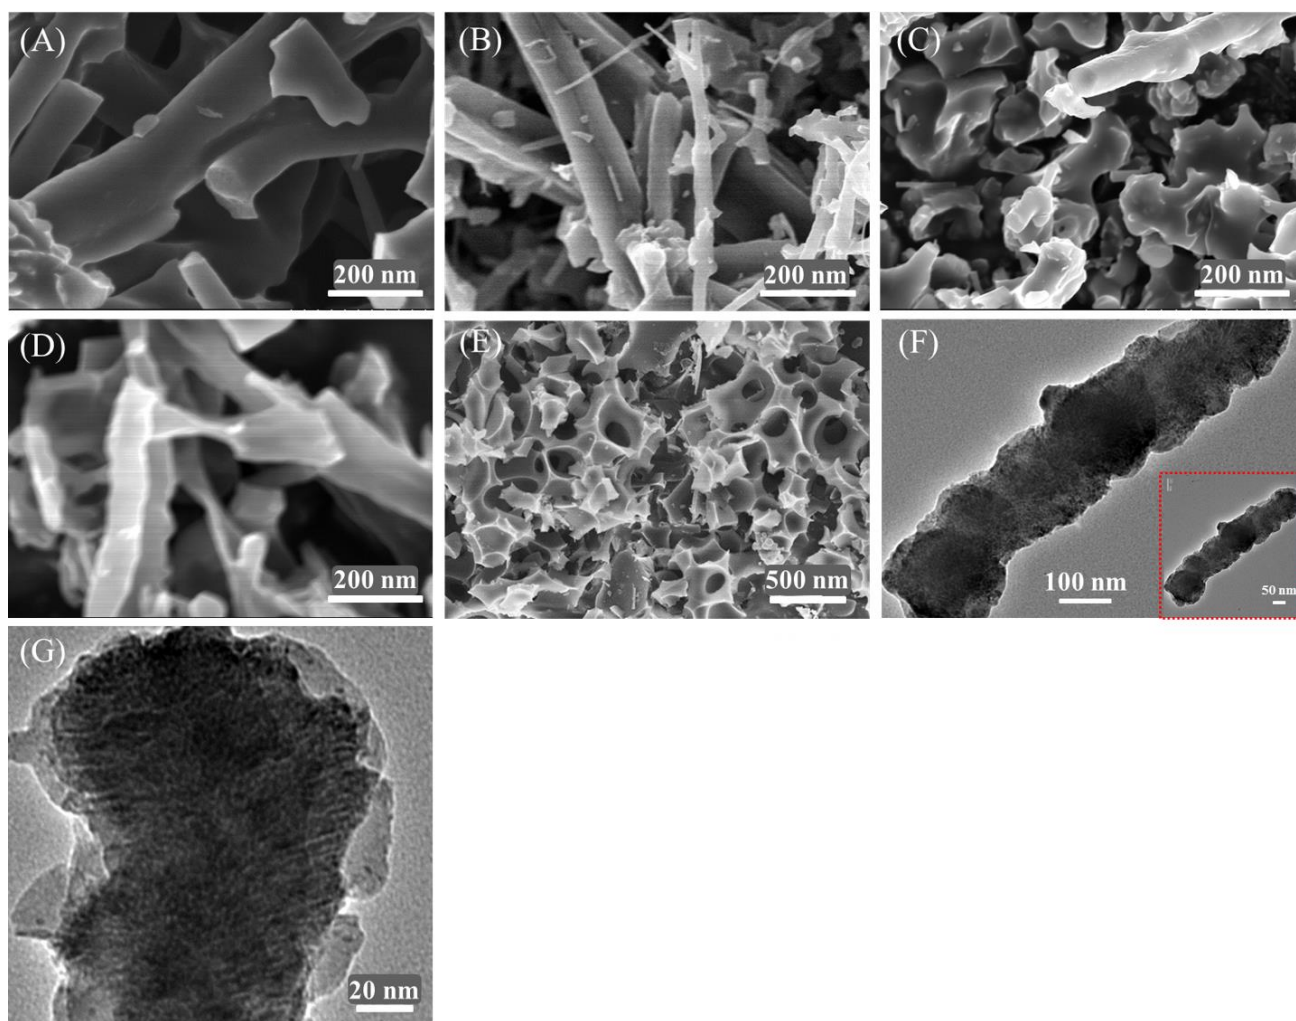

**Fig. S3** SEM images of precursor (A), NNC-KH-600 (B), NNC-KH-800 (C), NNC-700 (D), NNC-KO-700 (E). TEM images of typical NNC-KH-700 (F, G).

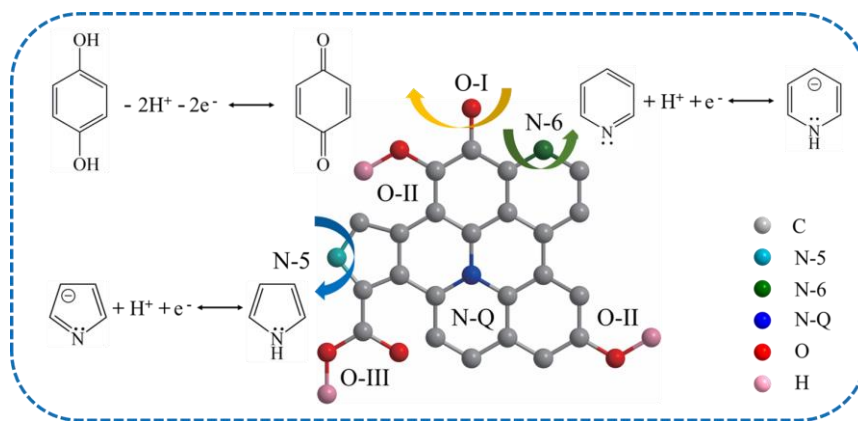

**Fig. S4** The locations of faradaic-active species (N-6, N-5 and O-I) in the carbon framework and corresponding redox reactions in acidic solution.

**Table S1.** The detailed electrochemical data of the devices.<sup>a</sup>

| Samples    | $R$ ( $\Omega$ ) | $R_s$ ( $\Omega$ ) | $R_{ct}$ ( $\Omega$ ) | $\tau$ ( $\Omega$ ) | $\sigma$ ( $\Omega \text{ s}^{-0.5}$ ) | $C_E$                 | $C_P$                 | $C_T$                 | $C_P/C_T$ |
|------------|------------------|--------------------|-----------------------|---------------------|----------------------------------------|-----------------------|-----------------------|-----------------------|-----------|
|            |                  |                    |                       |                     |                                        | ( $\text{F g}^{-1}$ ) | ( $\text{F g}^{-1}$ ) | ( $\text{F g}^{-1}$ ) | (%)       |
| NNC-KH-600 | 3.11             | 1.69               | 1.42                  | 2.32                | 0.91                                   | 166.9                 | 40.1                  | 207                   | 19.4      |
| NNC-KH-700 | 1.64             | 0.56               | 1.08                  | 0.94                | 0.74                                   | 284.3                 | 80.7                  | 365                   | 22.1      |
| NNC-KH-800 | 2.64             | 0.68               | 1.96                  | 2.95                | 0.76                                   | 231.9                 | 50.1                  | 282                   | 17.8      |
| NNC-700    | 3.53             | 1.52               | 2.01                  | 4.72                | 0.88                                   | 193.7                 | 32.3                  | 226                   | 14.3      |
| NNC-KO-700 | 3.65             | 0.76               | 2.89                  | 2.57                | 0.80                                   | 296.2                 | 39.8                  | 336                   | 11.8      |

<sup>a</sup>All capacitance values are measured at  $1 \text{ A g}^{-1}$ .

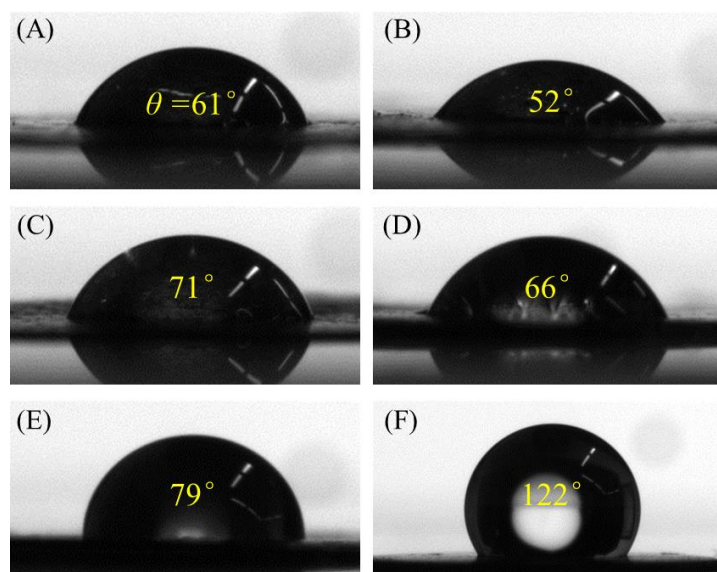

**Fig. S5** The water contact angle ( $\theta$ ) measurement results of NNC-KH-600 (A), NNC-KH-700 (B), NNC-KH-800 (C), NNC-700 (D), NNC-KO-700 (E), commercial activate carbon (F).

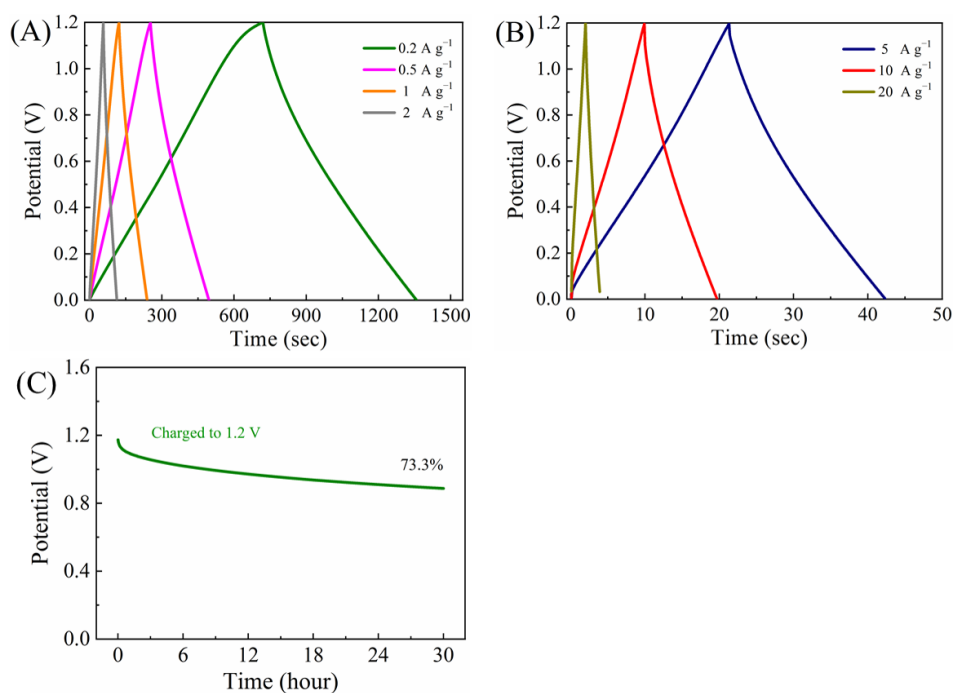

**Fig. S6** Electrochemical performances of the symmetric coin-typed cell based on NNC-KH-700 electrode using  $\text{H}_2\text{SO}_4+\text{KBr}$  electrolyte: GCD curves of NNC-KH-700 at different current densities from 0.2 to 20  $\text{A g}^{-1}$  (A, B). Self-discharge curve within the potential window of 0–1.2 V (C).

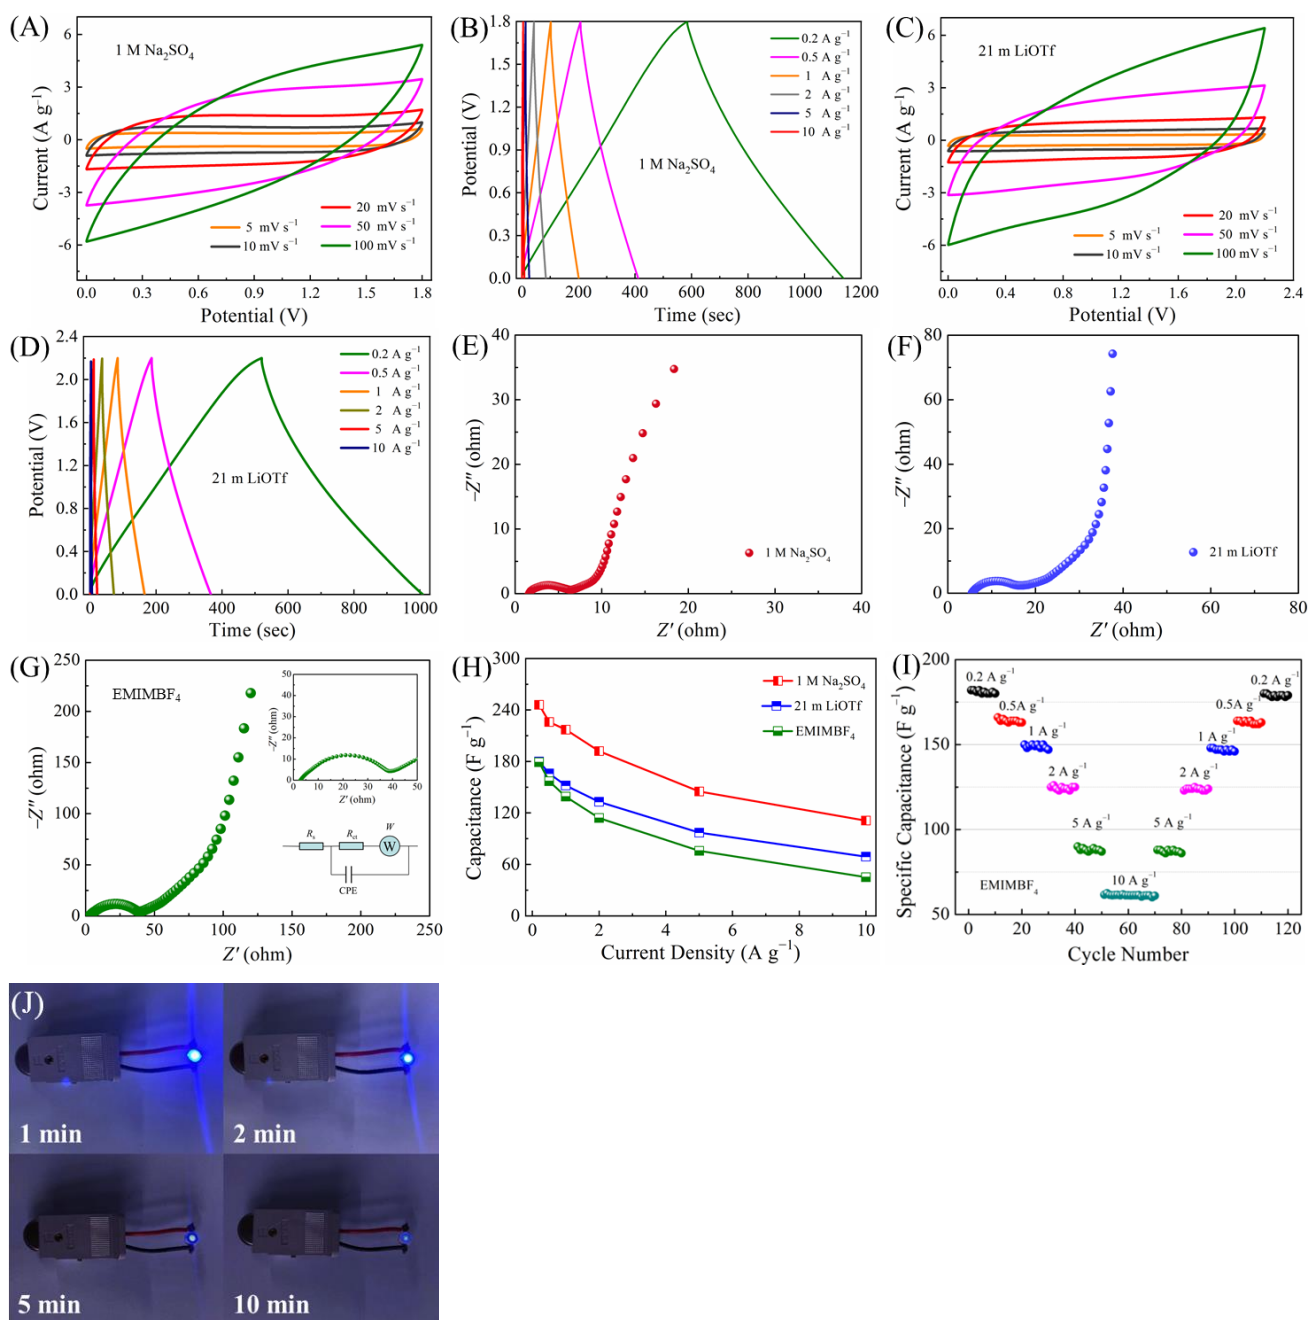

**Fig. S7** Electrochemical performances of the symmetric coin-typed cell based on NNC-KH-700 electrode: CV curves at different scan rates for 1 M Na<sub>2</sub>SO<sub>4</sub> (A). GCD curves at various current densities for 1 M Na<sub>2</sub>SO<sub>4</sub> (B). CV curves at different scan rates for 21 m LiOTf (C). GCD curves at various current densities for 21 m LiOTf (D). Nyquist plots for 1 M Na<sub>2</sub>SO<sub>4</sub> (E) and for 21 m LiOTf (F). Nyquist plot and equivalent series resistance for EMIMBF<sub>4</sub> (G). Capacitances vs current densities (H). Rate performance (I). Images of powered up LED using EMIMBF<sub>4</sub> electrolyte (J).

**Table S2.** Performance comparisons of reported carbon-based devices.

| Samples               | N/O Content (wt.%) | Specific Surface Area (m <sup>2</sup> g <sup>-1</sup> ) | Electrolyte                         | Specific Capacitance (F g <sup>-1</sup> ) | Energy Density (W h kg <sup>-1</sup> ) | References       |
|-----------------------|--------------------|---------------------------------------------------------|-------------------------------------|-------------------------------------------|----------------------------------------|------------------|
| <b>NNC-KH-700</b>     | 11.46/10.11        | 1840                                                    | H <sub>2</sub> SO <sub>4</sub> +KBr | 365                                       | 18.25                                  | <b>This work</b> |
|                       |                    |                                                         | 1 M Na <sub>2</sub> SO <sub>4</sub> | 248                                       | 24.4                                   |                  |
|                       |                    |                                                         | 21 m LiOTf                          | 180                                       | 30.1                                   |                  |
|                       |                    |                                                         | EMIMBF <sub>4</sub>                 | 179                                       | 89.5                                   |                  |
| TCNQ-CTF-800          | 8.13/-             | 3663                                                    | EMIMBF <sub>4</sub>                 | 100                                       | 42.8                                   | 1                |
| Ta-NCa <sub>850</sub> | 7.26/8.24          | 706                                                     | 1 M H <sub>2</sub> SO <sub>4</sub>  | 362                                       | -                                      | 2                |
| NO-PC                 | 2.2/4.8 at.%       | 3794                                                    | 6 M KOH                             | 269                                       | 18.9                                   | 3                |
| a-CNS/EG-10           | 5.3/-              | 1532                                                    | PVA/KOH                             | 234                                       | 6.3                                    | 4                |
| HMC-800               | 4.74/5.53          | 1306                                                    | 1 M LiPF <sub>6</sub>               | 126                                       | 29                                     | 5                |
| N1-GDY                | 3.7/2.65           | -                                                       | 7 M KOH                             | 250                                       | 8.66                                   | 6                |
| C-silkworm            | 2.15/12.58 at.%    | 2258                                                    | 1 M Na <sub>2</sub> SO <sub>4</sub> | 167                                       | 23.17                                  | 7                |
| CNS-800               | 4.9/-              | 1122                                                    | KOH/PVA                             | 190                                       | -                                      | 8                |
| N/S-HPCM              | 5.13/- at.%        | 927                                                     | 1 M Na <sub>2</sub> SO <sub>4</sub> | 127                                       | 17.6                                   | 9                |
| CBC3                  | 6.2/10.4 at.%      | 3534                                                    | 6 M KOH                             | 297                                       | 18                                     | 10               |

## References

1. Y. Li, S. Zheng, X. Liu, P. Li, L. Sun, R. Yang, S. Wang, Z. S. Wu, X. Bao and W. Q. Deng, Conductive microporous covalent triazine-based framework for high-performance electrochemical capacitive energy storage, *Angew. Chem. Int. Ed.*, 2018, **57**, 7992–7996.
2. Y. Li, L. Liu, Y. Wu, T. Wu, H. Wu, Q. Cai, Y. Xu, B. Zeng, C. Yuan and L. Dai, Facile synthesis of nitrogen-doped carbon materials with hierarchical porous structures for high-performance supercapacitors in both acidic and alkaline electrolytes, *J. Mater. Chem. A*, 2019, **7**, 13154–13163.
3. Y. Zhao, M. Wei, Z. Zhu, J. Zhang, L. Xiao and L. Hou, Facile preparation of N-O codoped hierarchically porous carbon from alginate particles for high performance supercapacitor, *J. Colloid Interface Sci.*, 2020, **563**, 414–425.
4. Y. Liu, X. Qiu, X. Liu, Y. Liu and L.-Z. Fan, 3D porous binary-heteroatom doped carbon nanosheet/electrochemically exfoliated graphene hybrids for high performance flexible solid-state supercapacitors, *J. Mater. Chem. A.*, 2018, **6**, 8750–8756.
5. W. Qian, F. Sun, Y. Xu, L. Qiu, C. Liu, S. Wang and F. Yan, Human hair-derived carbon flakes for electrochemical supercapacitors, *Energy Environ. Sci.*, 2014, **7**, 379–386.
6. H. Shang, Z. Zuo, H. Zheng, K. Li, Z. Tu, Y. Yi, H. Liu, Y. Li and Y. Li, N-doped graphdiyne for high-performance electrochemical electrodes, *Nano Energy*, 2018, **44**, 144–154.
7. S. Lei, L. Chen, W. Zhou, P. Deng, Y. Liu, L. Fei, W. Lu, Y. Xiao and B. Cheng, Tetra-heteroatom self-doped carbon nanosheets derived from silkworm excrement for high-performance supercapacitors, *J. Power Sources*, 2018, **379**, 74–83.
8. T. Wei, X. Wei, L. Yang, H. Xiao, Y. Gao and H. Li, A one-step moderate-explosion assisted carbonization strategy to sulfur and nitrogen dual-doped porous carbon nanosheets derived from



camellia petals for energy storage, *J. Power Sources*, 2016, **331**, 373–381.

9. L. Sun, Y. Zhou, L. Li, H. Zhou, X. Liu, Q. Zhang, B. Gao, Z. Meng, D. Zhou and Y. Ma, Facile and green synthesis of 3D honeycomb-like N/S-codoped hierarchically porous carbon materials from bio-protic salt for flexible, temperature-resistant supercapacitors, *Appl. Surf. Sci.*, 2019, **467–468**, 382–390.
10. D. Qiu, M. Li, C. Kang, J. Wei, F. Wang and R. Yang, Cucurbit[6]uril-derived sub-4 nm pores-dominated hierarchical porous carbon for supercapacitors: operating voltage expansion and pore size matching, *Small*, 2020, **16**, 2002718.
